# Supplementary material
Source: MDPI journal article supplement (https://www.mdpi.com/2073-4441/13/11/1451)
Supplement: s1 [file s1]

Figure S1: Pearson correlation matrix for all the analysed parameters. \*  $p \leq 0.005$ . H, O and C represents  $\delta^2\text{H}$ ,  $\delta^{18}\text{O}$  and  $\delta^{13}\text{C}_{\text{DIC}}$ , respectively.

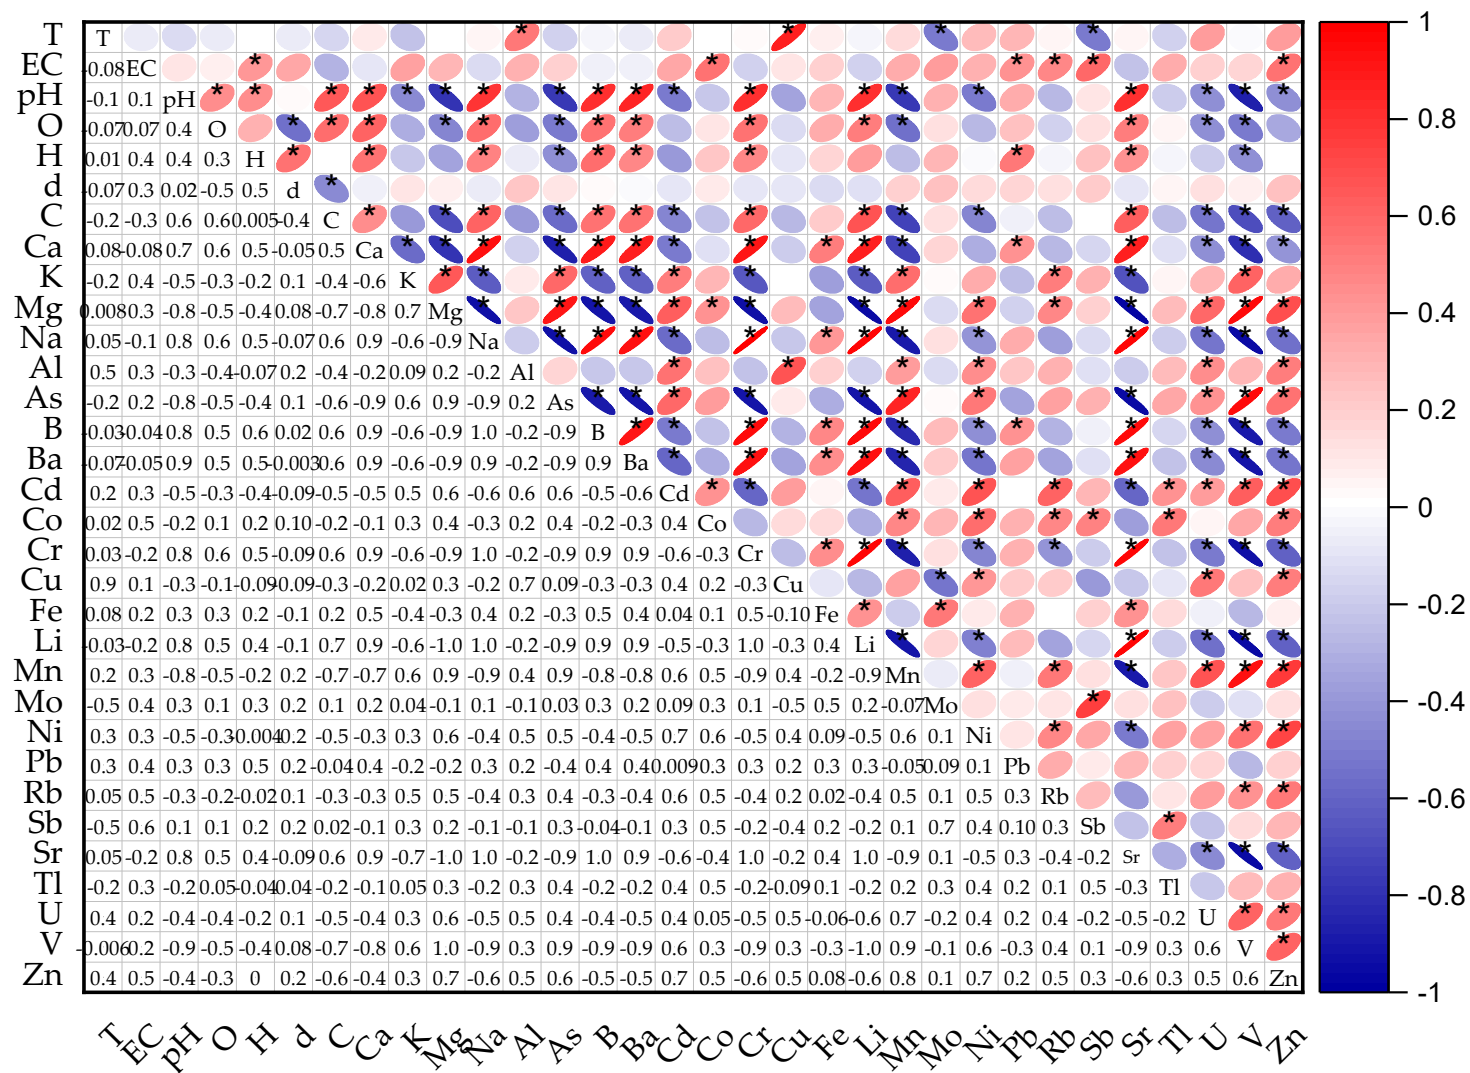

\*  $p \leq 0.05$
